# Supplementary material for: Effects of Aminoglycoside Antibiotics on Human Embryonic Stem Cell Viability during Differentiation In Vitro
Source: Hindawi journal article supplement (doi:10.1155/2017/2451927), 2017-01-01

**Figure S1. Antibiotic treatment of H9 cells during hepatic and neural differentiation causes cell death.** The cells were treated with 0, 10, 25, 50 and 200ug/ml gentamicin (images 1-5 respectively) and 0, 10, 25, 50 and 200ug/ml gentamicin combined with Pen-Strep (100U/ml-100ug/ml) images 6-10 respectively. The cells were imaged in bright-field on day-5 and day-10 of hepatic and neural differentiation respectively.

### Hepatic differentiation (Day-5)

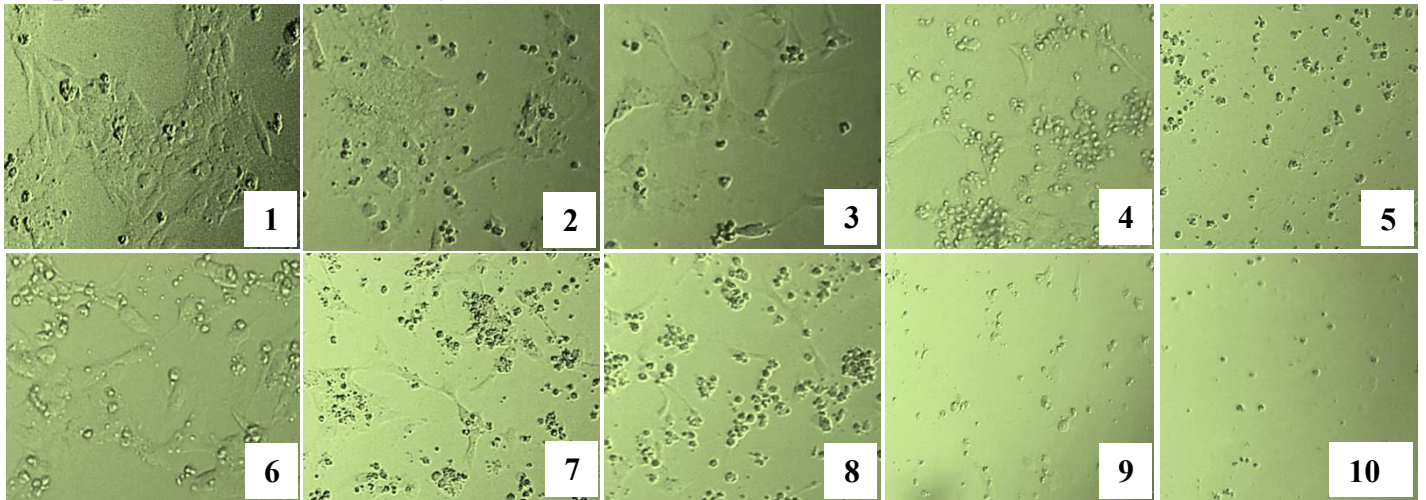

### Neural differentiation (Day-10)

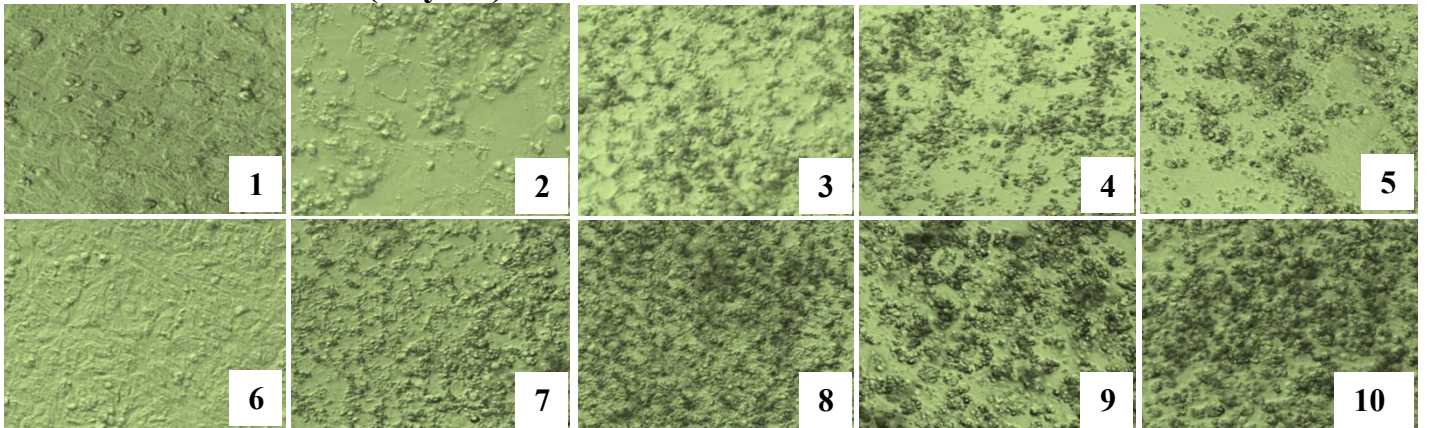

**Figure S2. RNA expression analysis of indicated genes from H9 cells differentiated towards neurons.** Number of reads from RNA-seq data for indicated genes were retrieved from CORTECON (<http://cortecon.neuralsci.org/>) [13] and were plotted against days post neural induction. The data are represented as mean  $\pm$  standard deviation.

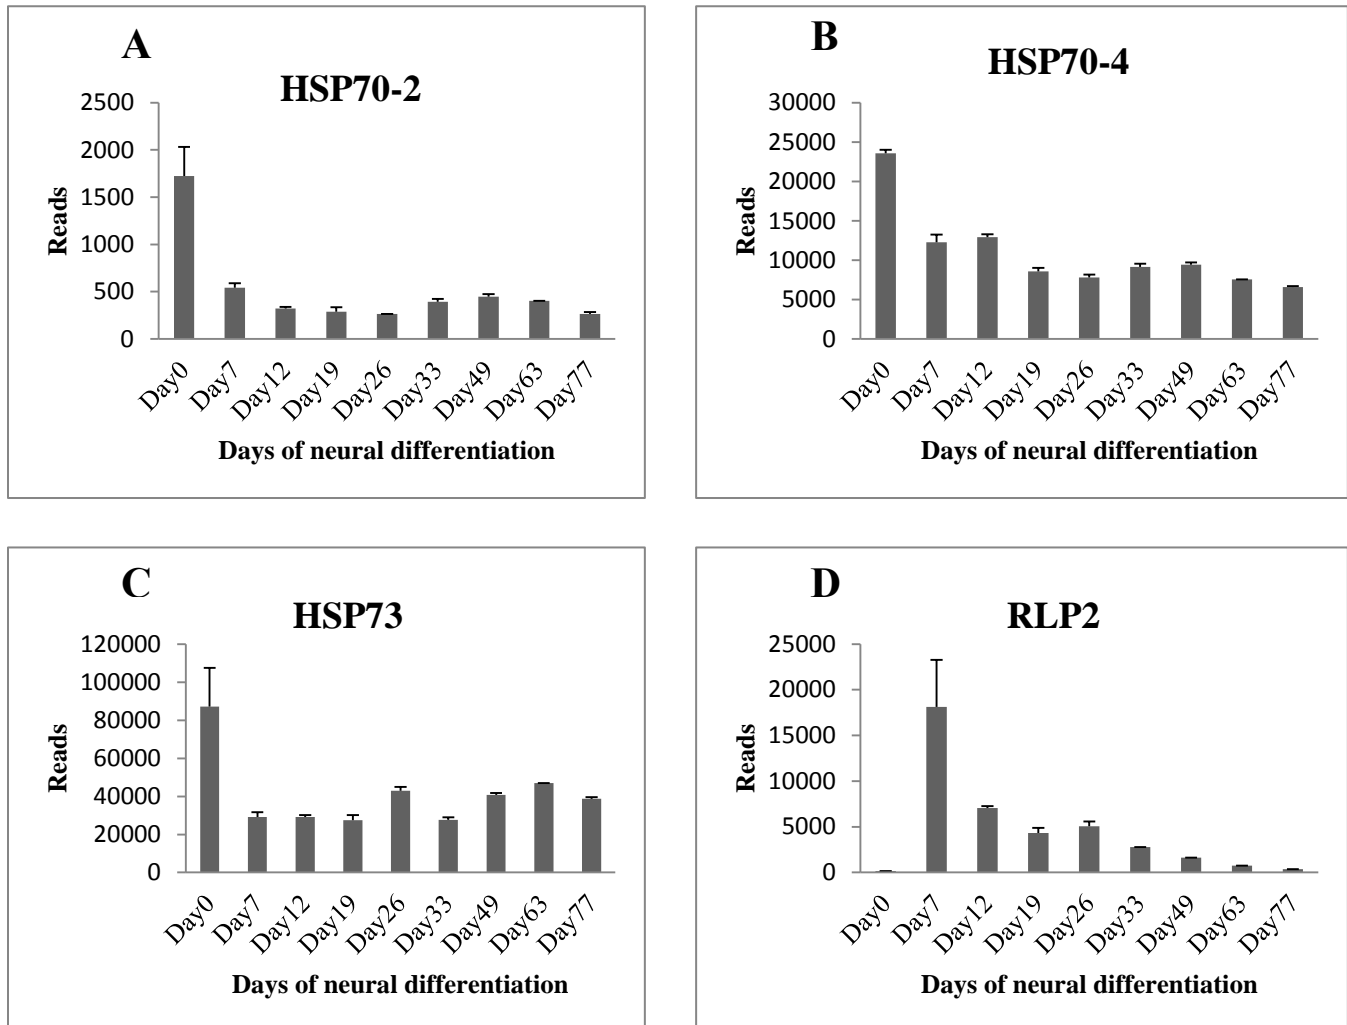

Supplement: f1 [file 2451927.f1.pdf]
